# Supplementary material for: Functional Characterization of Serum Amyloid P Component (SAP) in Host Defense against Bacterial Infection in a Primary Vertebrate
Source: MDPI journal article supplement (doi:10.3390/ijms23169468), 2022-08-22
Supplement: s1 [file s1]

Supplementary Table S1. The primers used in this study.

| Primers          | Sequence (5'-3')                     | Purpose            |
|------------------|--------------------------------------|--------------------|
| OnSAP-F          | GCACTCTTCCAACAATCT                   | Sequencing         |
| OnSAP-R          | CACTCTTCCAACAATCT                    | Sequencing         |
| EOnSAP-F         | CCGGAATTCAATAAAATATTCATCTTCCCACAACAA | Protein expression |
| EOnSAP-R         | CCGAAGCTTCACTCTTCCAACAATCTGAAACTCA   | Protein expression |
| qOnSAP-F         | TCTCTGGCTACACCCTCTGCTAT              | RT-qPCR            |
| qOnSAP-R         | ATCCCTTCAACTTTATTCGCCTTGC            | RT-qPCR            |
| T7               | TAATACGACTCACTATAGGG                 | Sequencing         |
| T7t              | GCTAGTTATTGCTCAGCGG                  | Sequencing         |
| $\beta$ -actin-F | CGAGAGGGAAATCGTGCCTGACA              | Control, RT-qPCR   |
| $\beta$ -actin-R | AGGAAGGAAGGCTGGAAGAGGGC              | Control, RT-qPCR   |

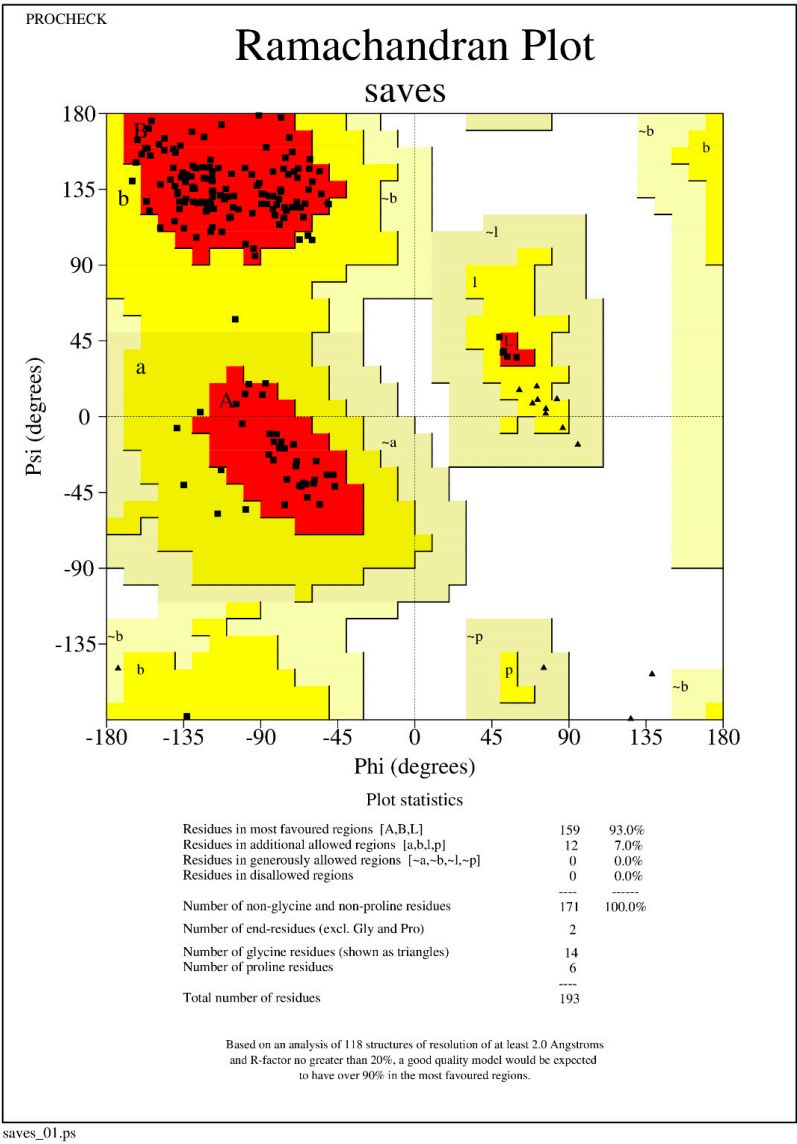

Supplementary Figure S1. Ramachandran PLOT analysis for OnSAP structure verification.
